# Supplementary material for: Composition-controlled synthesis and tunable optical properties of ternary boron carbonitride nanotubes
Source: Royal Society of Chemistry journal article supplement (doi:10.1039/c7ra00449d), 2017-01-01
Supplement: c7ra00449d1.pdf [file c7ra00449d1.pdf]

## Supporting Information

### Composition-controlled synthesis and tunable optical properties of ternary boron carbonitride nanotubes

Hongling Li,<sup>†a</sup> Roland Yingjie Tay,<sup>†a,b</sup> Siu Hon Tsang,<sup>b</sup> Lin Jing,<sup>c</sup> Minmin Zhu,<sup>a</sup> Fei Ni Leong<sup>a</sup> and Edwin Hang Tong Teo<sup>\*a,c</sup>

<sup>a</sup> School of Electrical and Electronic Engineering, Nanyang Technological University, 50 Nanyang Avenue, Singapore 639798, Singapore

<sup>b</sup> Temasek Laboratories@NTU, 50 Nanyang Avenue, Singapore 639798, Singapore

<sup>c</sup> School of Materials Science and Engineering, Nanyang Technological University, 50 Nanyang Avenue, Singapore 639798, Singapore

<sup>†</sup> These two authors contribute equally to this work.

\* *Corresponding author.* Tel: +65 67906371. E-mail address: [HTTEO@ntu.edu.sg](mailto:HTTEO@ntu.edu.sg).

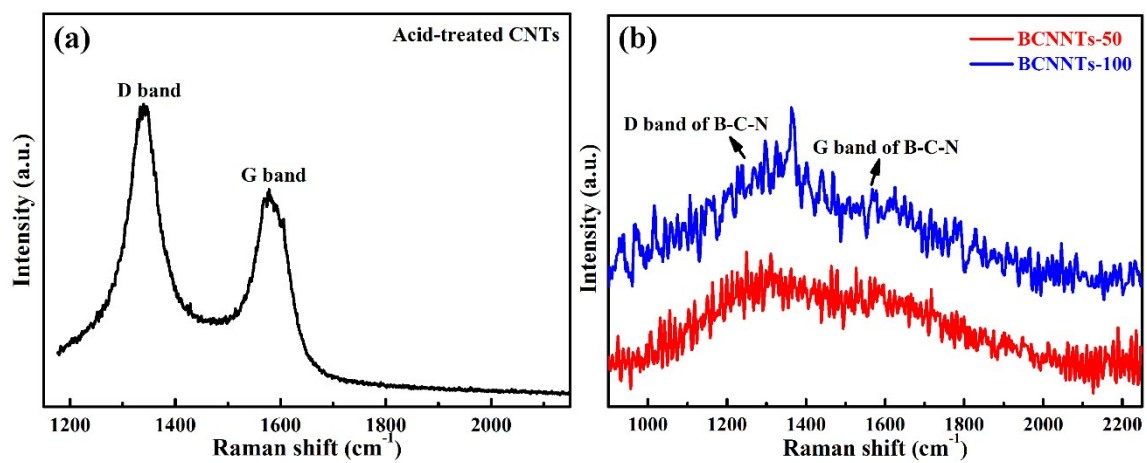

**Figure S1** Raman spectra of (a) acid-treated CNTs and (b) as-prepared BCNNTs.
